# Supplementary material for: An updated roadmap for MERS-CoV research and product development: focus on diagnostics
Source: PubMed Central journal article supplement — BMJ Glob Health. 2019 Feb 1;4(Suppl 2):e001105. doi: 10.1136/bmjgh-2018-001105 (PMC6361340; doi:10.1136/bmjgh-2018-001105), 2019-02-01
Supplement: bmjgh-2018-001105supp001.pdf [file bmjgh-2018-001105supp001.pdf]

**Table S1: Molecular Diagnostic Tests for MERS-CoV**

Commercial and regulated assays for MERS-CoV are presented. Legacy lab-developed tests and in-house assays are not presented here, as sensitivity/specificity/LOD data is lab-specific (see MERS-CoV Matrix of Suppliers.xlsx for further detail).

| Commercial – single assays                                       |                                                                        |                                   |                                                                                  |                            |                                                                              |                                                                         |                                                                                                            |                                                                                                             |                                             |
|------------------------------------------------------------------|------------------------------------------------------------------------|-----------------------------------|----------------------------------------------------------------------------------|----------------------------|------------------------------------------------------------------------------|-------------------------------------------------------------------------|------------------------------------------------------------------------------------------------------------|-------------------------------------------------------------------------------------------------------------|---------------------------------------------|
| Developer                                                        | System                                                                 | Regulation                        | Sample Type                                                                      | Target                     | LOD                                                                          | Sensitivity /PPA                                                        | Specificity /NPA                                                                                           | Specimens tested                                                                                            | Reference assay                             |
| Altona Diagnostics GmbH (GER)                                    | RealStar MERS-CoV RT-PCR Kit 1.0<br>RealStar®<br>(US EUA, EU versions) | FDA EUA 2016<br>CE-IVD<br>WHO EUA | Extracted RNA is the starting material for the RealStar® MERS-CoV RT-PCR Kit 1.0 | upE, orf1a (single assays) | upE: 0.54 copies/µl (540 copies/mL)<br>orf1a: 0.93 copies/µl (930 copies/mL) | 100% >2.25xLOD (in-house assay)                                         | 95%-100% clinical negative for 17 infective agents, incl CoV NL63, OC43, 229E, HKU-1, H3N2, H1N1, RSV A/B) | 19 clinical samples from one patient tested at the Institute of Virology, University of Bonn Medical Centre | No true clinical samples - known spiked RNA |
| BioGX (USA)                                                      | MERS-CoV ORF1a, upE Open System Reagents for BD MAX™                   | RUO<br>US export only             | sputum                                                                           | upE, orf1a                 | no info                                                                      | no info                                                                 | negative for 39 pathogens                                                                                  | no info                                                                                                     | no info                                     |
| BioinGentech (Chile)                                             | HumqPCR-realtime™ MERS-CoV<br>VetqPCR-realtime™ MERS-CoV               | CE                                | no info                                                                          | no info                    | no info                                                                      | no info                                                                 | no info                                                                                                    | no info                                                                                                     | no info                                     |
| Bioneer (KOR)                                                    | AccuPower MERS-CoV (upE&ORF1a) Real-Time RT-PCR Kit                    | CE-IVD                            | sputum, nasopharyngeal swab and bronchoalveolar lavage                           | upE, orf1a                 | upE: 5.5 copies/test<br>orf1a: 8.9 copies/test                               | no info                                                                 | negative for 26 pathogens and human total RNA                                                              | no info                                                                                                     | no info                                     |
| BioSB / LifeRiver (USA)<br>Shanghai ZJ Bio-Tech Co., Ltd (China) | MERS-CoV Real Time PCR Kit                                             | CE-IVD                            | sputum, gargle or PBMC from non-heparin anticoagulation                          | upE, N                     | 1×10 <sup>3</sup> copies/ml                                                  | no info                                                                 | no info                                                                                                    | no info                                                                                                     | no info                                     |
| Fast-track Diagnostics (Malta)<br>(partnered with Siemens 2017)  | FTD MERS-CoV also FTIyo MERS-CoV (master mix)                          | CE-IVD                            | throat/nasal swabs, bronchoalveolar lavage and sputum                            | upE                        | 10 <sup>3</sup> copies/ml                                                    | 87% (15 specimens - proficiency panel)<br>100% (10 samples, QMCD panel) | 100% (77 clinical samples containing bacteria and viruses)                                                 | 15 positive specimens, 20 negative specimens                                                                | no info                                     |
| Genesig /Primerdesign (UK)                                       | Human Coronavirus MERS kit (HCoV_2012) (also master mix option)        | RUO                               | not listed                                                                       | upE, orf1a/b               | can detect < 100 copies of target template                                   | no info                                                                 | no info                                                                                                    | no info                                                                                                     | no info                                     |

|                                               |                                                                 |        |                                                                                                                    |                            |                                                                       |                                                                    |                                                                |                                                      |         |
|-----------------------------------------------|-----------------------------------------------------------------|--------|--------------------------------------------------------------------------------------------------------------------|----------------------------|-----------------------------------------------------------------------|--------------------------------------------------------------------|----------------------------------------------------------------|------------------------------------------------------|---------|
| KogeneBiotech (KOR)                           | PowerChek MERS Real-Time PCR kit (also upE-only and orf1a kits) | CE-IVD | no info                                                                                                            | upE, orf1a                 | no info                                                               | no info                                                            | no info                                                        | no info                                              | no info |
| Seegene (KOR)                                 | Anyplex™ MERS-CoV (upE & orf1a) Real-time Detection (2nd gen)   | CE-IVD | nasopharyngeal aspirate, nasopharyngeal swab, bronchoalveolar lavage, and sputum                                   | upE, orf1a                 | 50 copies/rxn                                                         | no info                                                            | negative for 86 pathogens                                      | no info                                              | no info |
| SolGent (KOR)                                 | DiaPlexQ MERS Virus Detection kit                               | RUO    | sputum                                                                                                             | upE, orf1a/1b              | no info                                                               | no info                                                            | no info                                                        | no info                                              | no info |
| TIB MOLBIOL GmbH (GER) (partnered with Roche) | LightMix <i>UpE</i><br>LightMix <i>Orf1a</i>                    | RUO    | nasopharyngeal or oropharyngeal swabs, lower respiratory tract tracheal aspirates or bronchoalveolar lavage, serum | upE, orf1a (single assays) | upE: 3.4 copies/rxn, 291 copies/mL of sample<br>orf1a: 4.1 copies/rxn | 1 clinical MERS specimen (detected by upE and orf1a but not orf1b) | 100%<br>orf1a: 42 clinical samples<br>upE 92: clinical samples | 1 clinical MERS specimen (in pub); 42 & 92 negatives | no info |

| Commercial – multiplex assays   |                                                             |                   |                                                                     |                                                                                                                                                                                                                                                                                                    |                                                                                                      |                                                                                                                                            |                                                                                                                                                                                                                              |                                                          |                 |
|---------------------------------|-------------------------------------------------------------|-------------------|---------------------------------------------------------------------|----------------------------------------------------------------------------------------------------------------------------------------------------------------------------------------------------------------------------------------------------------------------------------------------------|------------------------------------------------------------------------------------------------------|--------------------------------------------------------------------------------------------------------------------------------------------|------------------------------------------------------------------------------------------------------------------------------------------------------------------------------------------------------------------------------|----------------------------------------------------------|-----------------|
| Developer                       | System                                                      | Regulatory status | Sample Type                                                         | Target                                                                                                                                                                                                                                                                                             | LOD                                                                                                  | Sensitivity /PPA                                                                                                                           | Specificity /NPA                                                                                                                                                                                                             | Specimens tested                                         | Reference assay |
| BioFire /bioMerieux (USA)       | FilmArray Respiratory Panel 2 plus (RP2plus) (MERS EU ONLY) | CE-IVD            | nasopharyngeal swabs (NPS)                                          | 23 pathogens: MERS-CoV, Adenovirus, Coronavirus (229E, HKU1, NL63, OC43), Human Bocavirus, Human Metapneumovirus, Human Rhinovirus/Enterovirus, Influenza (A, A H1, A H1-2009, A H3, B), Parainfluenza (1, 2, 3, 4), RSV (A, B); Bordetella pertussis, Chlamydia pneumoniae, Mycoplasma pneumoniae | no info                                                                                              | no info                                                                                                                                    | no info                                                                                                                                                                                                                      | no info                                                  | no info         |
| Ecoli Ltd. (Slovak Republic)    | AmpliSens Cov-Bat-FRT PCR kit, MERS + SARS                  | CE-IVD            | nasopharyngeal and oropharyngeal swabs, blood plasma, sputum, feces | MERS-CoV: upE<br>SARS-CoV: Pol gene                                                                                                                                                                                                                                                                | 1 x 10 <sup>3</sup> GE/ml<br><br>Genome equivalents (GE) of the pathogen agent per 1 ml of a sample. | 98%-100% spiked specimens<br><br>"The clinical specificity of AmpliSens® Cov-Bat-FRT PCR kit was confirmed in laboratory clinical trials." | 98%-100% feline coronavirus (FC0 and FC1), canine coronavirus, avian coronavirus, Cov-E229, Cov-OC43, Cov-HKU1, Cov-NL63, influenza virus A and B, respiratory syncytial virus, methapneumovirus, parainfluenza viruses, ... | spiked biological samples with MERS-Cov RNA and SARS RNA | no info         |
| GenMark Diagnostics, Inc. (USA) | ePlex respiratory pathogen panel (RP panel) (MERS EU ONLY)  | CE-IVD            | nasopharyngeal swabs (NPS)                                          | 22 pathogens: MERS-CoV, Bordetella parapertussis, Adenovirus, CoV (229E, HKU1, NL63, OC43), Influenza (A, A/H3, A/2009-H1, B), Human Metapneumovirus, Human Rhinovirus/Enterovirus, Parainfluenza (PIV1, PIV2, PIV3, PIV4), RSV A                                                                  | no info                                                                                              | no info                                                                                                                                    | no info                                                                                                                                                                                                                      | no info                                                  | no info         |
