# Supplementary material for: An updated roadmap for MERS-CoV research and product development: focus on diagnostics
Source: PubMed Central journal article supplement — BMJ Glob Health. 2019 Feb 1;4(Suppl 2):e001105. doi: 10.1136/bmjgh-2018-001105 (PMC6361340; doi:10.1136/bmjgh-2018-001105), 2019-02-01
Supplement: bmjgh-2018-001105supp002.pdf [file bmjgh-2018-001105supp002.pdf]

**Table S2: Serology Tests**

Commercial and regulated assays for MERS-CoV are presented. Legacy lab-developed tests and in-house assays are not presented here, as sensitivity/specificity/LOD data is lab-specific (see MERS-CoV Matrix of Suppliers.xlsx for further detail).

| Commercial ELISA and IFT/IFA                    |                                     |                   |                                          |                                                                                                                                            |                                                                           |                      |                       |                                                                              |                                                                                        |
|-------------------------------------------------|-------------------------------------|-------------------|------------------------------------------|--------------------------------------------------------------------------------------------------------------------------------------------|---------------------------------------------------------------------------|----------------------|-----------------------|------------------------------------------------------------------------------|----------------------------------------------------------------------------------------|
| Developer                                       | System                              | Regulatory status | Sample Type                              | Target                                                                                                                                     | LOD                                                                       | Sensitivity /PPA     | Specificity /NPA      | Specimens tested                                                             | Reference assay                                                                        |
| Alpha Diagnostic International (US)             | Camel Anti-MERS-NP IgG ELISA Kit    | RUO               | serum, plasma or other biological fluids | Recombinant (sf9), purified (95%, ~46 kda), full length MERS-NP protein MERS-CoV ([Human betacoronavirus 2c EMC/2012]) is used as antigen. | <0.75 ug/mL IgG or IgM                                                    | no info              | no info               | no info                                                                      | no info                                                                                |
| Alpha Diagnostic International (US)             | Human Anti-MERS-RBD IgG ELISA Kit   | RUO               | serum, plasma or other biological fluids | Recombinant purified (95%, MERS-CoV-RBD, 383-502 aa ~14.5 kda) protein (Human betacoronavirus 2c EMC/2012) is used as antigen.             | <0.75 ug/mL IgG or IgM                                                    | no info              | no info               | no info                                                                      | no info                                                                                |
| Alpha Diagnostic International (US)             | Human Anti-MERS-S2 IgG ELISA Kit    | RUO               | serum, plasma or other biological fluids | Recombinant (sf9), MERS-S2 (95%, ~66 kda, full length) MERS-S2 protein (Human betacoronavirus 2c EMC/2012) is used as antigen.             | <0.75 ug/mL IgG or IgM                                                    | no info              | no info               | no info                                                                      | no info                                                                                |
| EUROIMMUN (GER) (acquired by Perkin Elmer 2017) | Camel Anti-MERS-CoV-ELISA (IgG)     | CE-IVD            | Camel serum or plasma                    | purified spike protein domain S1 antigen of MERS coronavirus (MERS-CoV S1)                                                                 | The lower detection limit of the Anti-MERS-CoV ELISA (IgG) is ratio 0.04. | 100% (151 specimens) | 100% (33 specimens)   | Sera from 184 camels (151 positive, 33 negative)                             | in-house assays (rIFA, vIFA) of the Institute of Virology, University of Bonn, Germany |
| EUROIMMUN (GER) (acquired by Perkin Elmer 2017) | Camel Anti-MERS-CoV IIFT (IgG, IgM) | CE-IVD            | Camel serum and plasma                   | MERS coronavirus-infected and non-infected cells (species EU 14)                                                                           | Titer < 1 : 100                                                           | 99.4%                | 100%                  | Sera from 196 camels (163 positive, 33 negative)                             | in-house assays (rIFA, vIFA) of the Institute of Virology, University of Bonn, Germany |
| EUROIMMUN (GER) (acquired by Perkin Elmer 2017) | Human Anti-MERS-CoV-ELISA (IgG)     | CE-IVD            | Human (serum)                            | purified spike protein domain S1 antigen of MERS coronavirus (MERS-CoV S1)                                                                 | The lower detection limit of the Anti-MERS-CoV ELISA (IgG) is ratio 0.04. | 100% (4 specimens)   | 99.8% (500 specimens) | Sera from four patients with MERS and 500 blood donors with other infections | in-house assays (rIFA, vIFA) of the Institute of Virology, University of Bonn, Germany |

|                                                 |                                     |        |                        |                                                                                                                                                   |                                                                                                                                            |           |           |                                                                                                                                             |                                                                                        |
|-------------------------------------------------|-------------------------------------|--------|------------------------|---------------------------------------------------------------------------------------------------------------------------------------------------|--------------------------------------------------------------------------------------------------------------------------------------------|-----------|-----------|---------------------------------------------------------------------------------------------------------------------------------------------|----------------------------------------------------------------------------------------|
| EUROIMMUN (GER) (acquired by Perkin Elmer 2017) | Human Anti-MERS-CoV IIFT (IgG, IgM) | CE-IVD | Human serum and plasma | For the detection of antibodies against MERS coronavirus by indirect immunofluorescence, MERS coronavirus infected cells (species EU 14) are used | MERS IgG: Positive reaction at 1:100 indicates former or acute infection.<br>MERS IgM: Positive reaction at 1:10 indicates acute infection | 100% sens | 100% spec | IgG: 29 clinically characterized MERS positive; 264 negative samples<br>IgM: 5 clinically characterized MERS positive; 165 negative samples | in-house assays (rIFA, vIFA) of the Institute of Virology, University of Bonn, Germany |
|-------------------------------------------------|-------------------------------------|--------|------------------------|---------------------------------------------------------------------------------------------------------------------------------------------------|--------------------------------------------------------------------------------------------------------------------------------------------|-----------|-----------|---------------------------------------------------------------------------------------------------------------------------------------------|----------------------------------------------------------------------------------------|

#### Commercial RDT

| Developer                                 | System                                           | Regulatory status | Sample Type                                                            | Target           | LOD                                                    | Sensitivity /PPA | Specificity /NPA                                    | Specimens tested | Reference assay       |
|-------------------------------------------|--------------------------------------------------|-------------------|------------------------------------------------------------------------|------------------|--------------------------------------------------------|------------------|-----------------------------------------------------|------------------|-----------------------|
| BioNote Inc. (KOR) subsid of SD Biosensor | Camel Rapid MERS-CoV Ag Test (BioNote, RG1805SG) | RUO OIE 2016      | camel nasal swab                                                       | MERS-CoV antigen | 3.125 ng/mL of recombinant nucleocapsid Ag of MERS CoV | 93.9%            | 99.6% (OIE value) bovine/canine/feline corona virus | 66 pos, 523 neg  | UpE and Orf1A rRT-PCR |
| SD Biosensor (KOR)                        | Human SD Q Line MERS-CoV Ag                      | RUO (?)           | sputum and bronchoalveolar lavage, tracheal aspirate and pleural fluid | MERS-CoV antigen | no info                                                | no info          | no info                                             | no info          | no info               |
